# Supplementary material for: In vitro detection of calcium in bone by modified carbon dots
Source: Royal Society of Chemistry journal article supplement (doi:10.1039/c3an01239e), 2013-01-01
Supplement: c3an01239e.pdf [file c3an01239e.pdf]

## ***In Vitro* detection of calcium in bone by modified carbon dots**

**A. Shanti Krishna, C. Radhakumary and K. Sreenivasan**

Laboratory for polymer Analysis, Biomedical Technology Wing

Sree Chitra Tirunal Institute for Medical Sciences & Technology, Poojapura, Trivandrum

– 695012, India. Fax: 091- 471- 2341814; Tel:091 471 2520248; E-mail:

sreeni@sctimst.ac.in

### **Supporting Information**

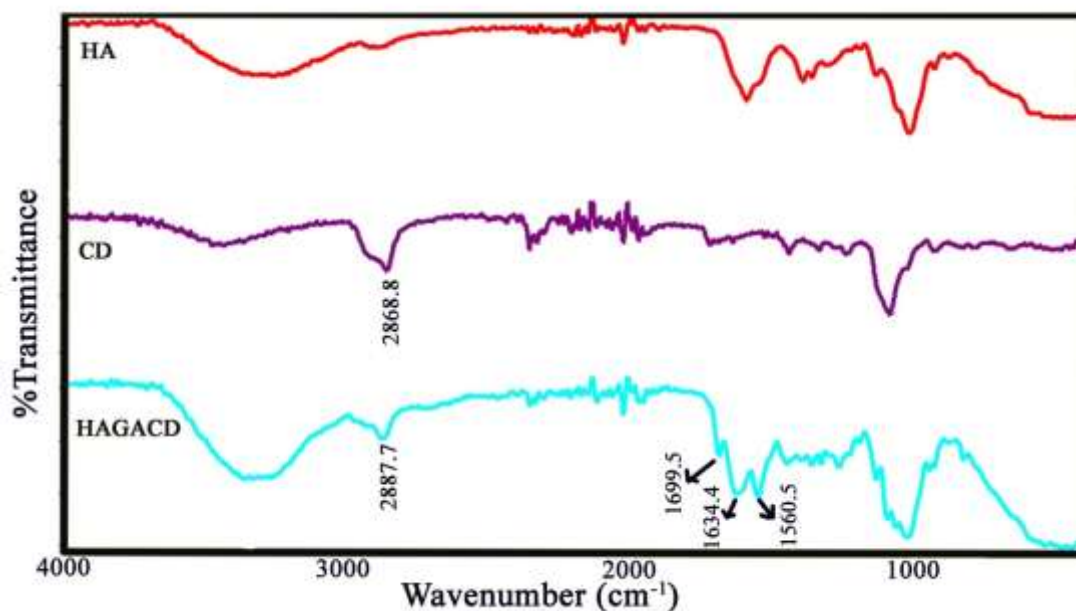

**Fig S1. FTIR spectra of HA, CD and HAGACD**

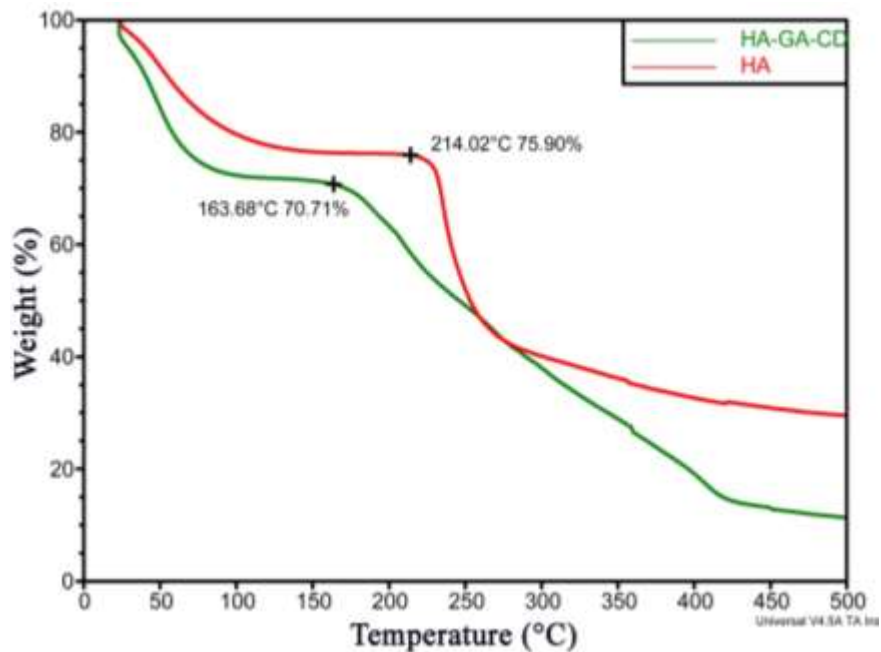

Fig S2. Thermograms of HA and HAGACD (at 10°C min<sup>-1</sup>, in N<sub>2</sub> atmosphere)

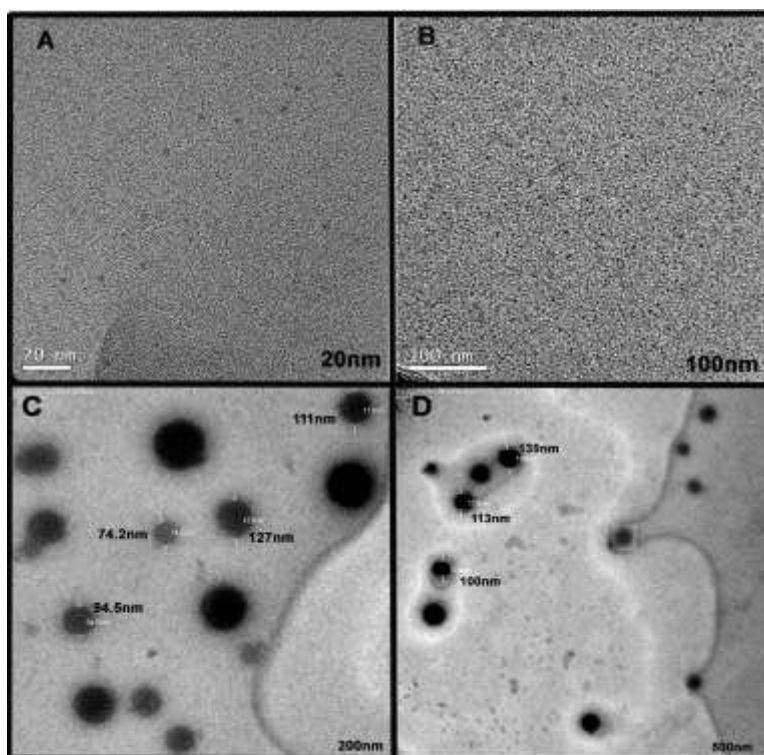

Fig S3. A and B HRTEM micrographs of CD and C and D TEM micrographs of HAGACD

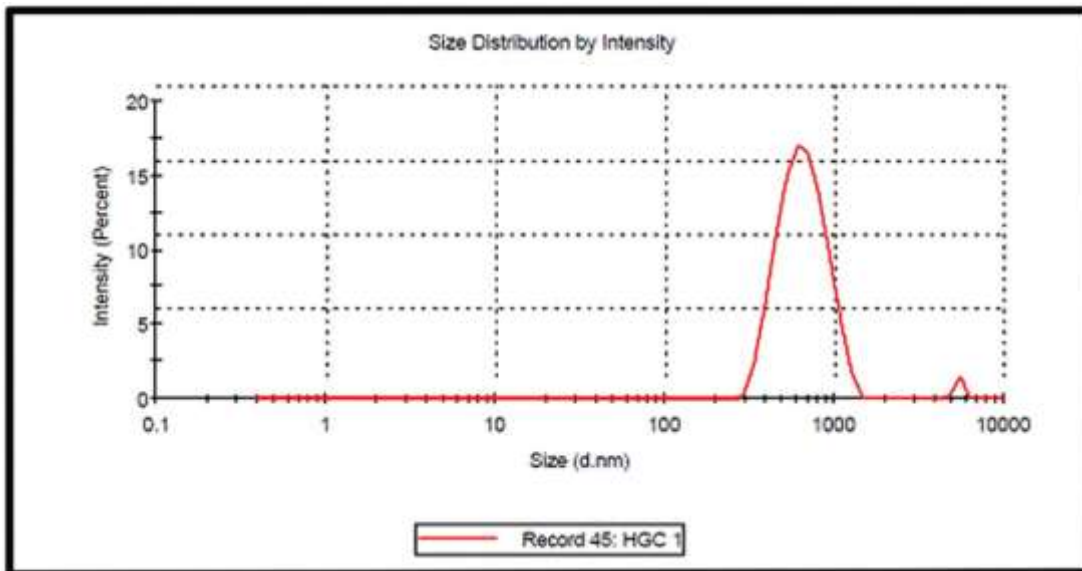

Fig S4. DLS profile of HAGACD

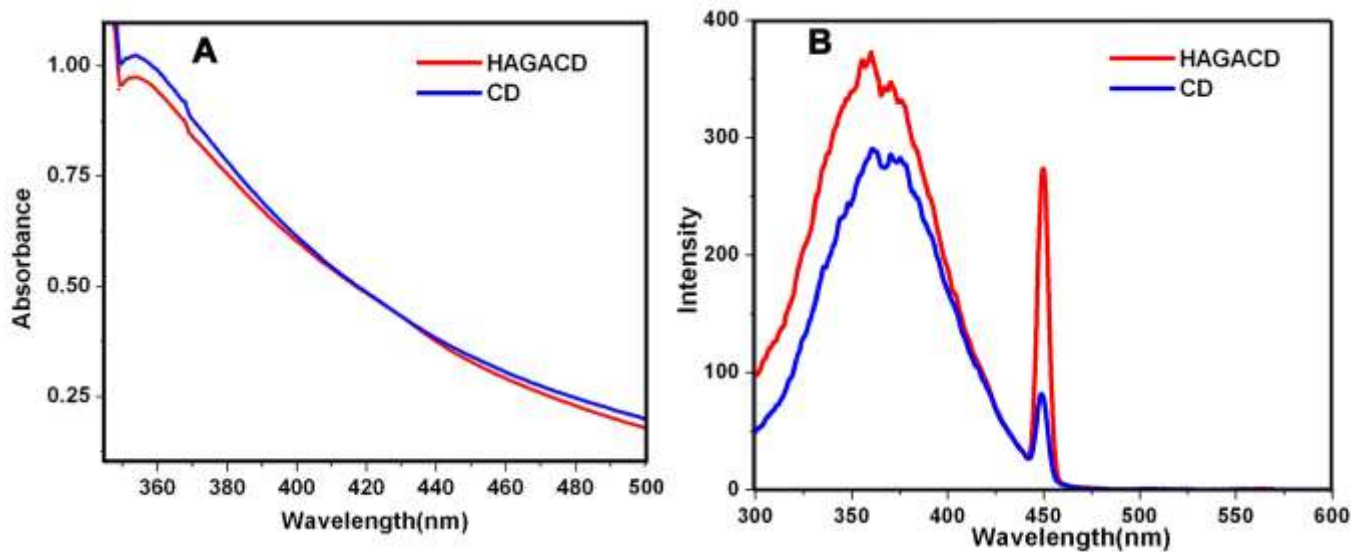

Fig S5. A) UV-Visible absorption and B) Fluorescence excitation spectra of CD and HAGACD

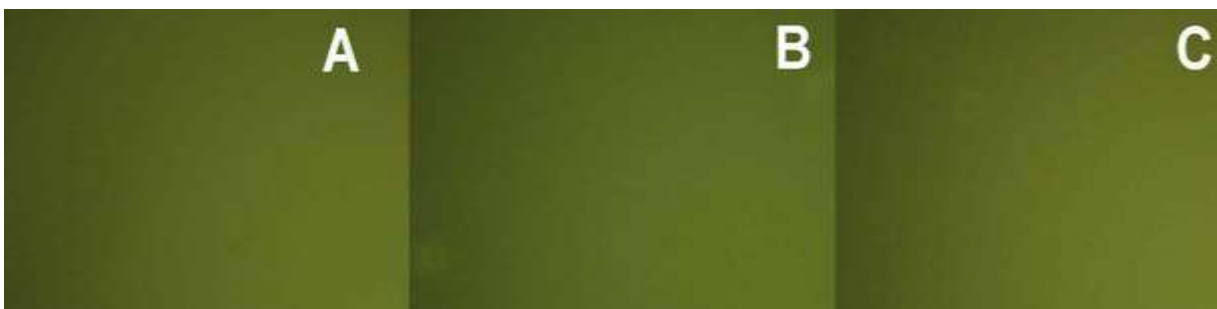

**Fig S6.** PVA films containing A) 0.02M Ca<sup>2+</sup> B) 0.25M Ca<sup>2+</sup> C) 0.5M Ca<sup>2+</sup> incubated with HAGACD

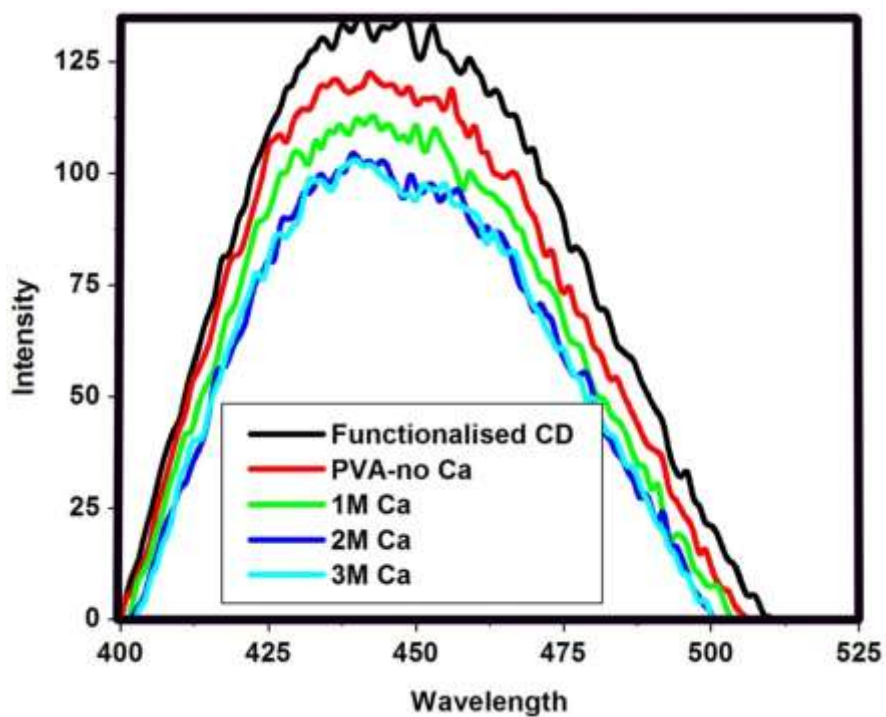

**Fig S7.** Fluorescence emission of HAGACD solutions after removing the incubated polymer strips. Intensity remains the same of solutions treated with polymer strips containing 2 M and 3 M reflecting saturation in binding.

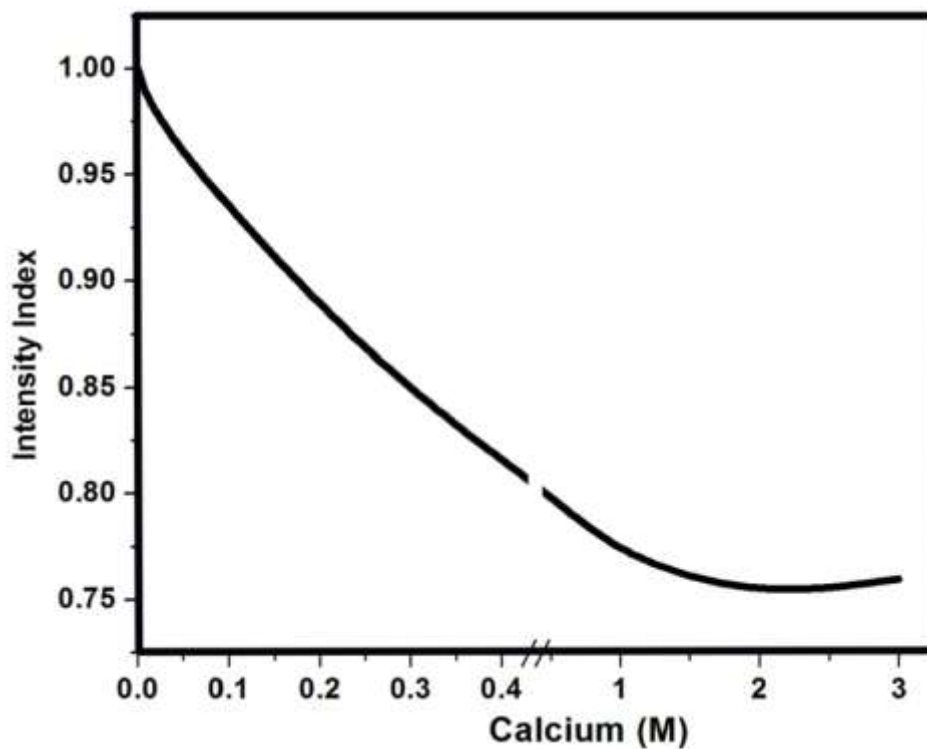

Fig S8. Intensity index Vs calcium ion concentration of the residual HAGACD

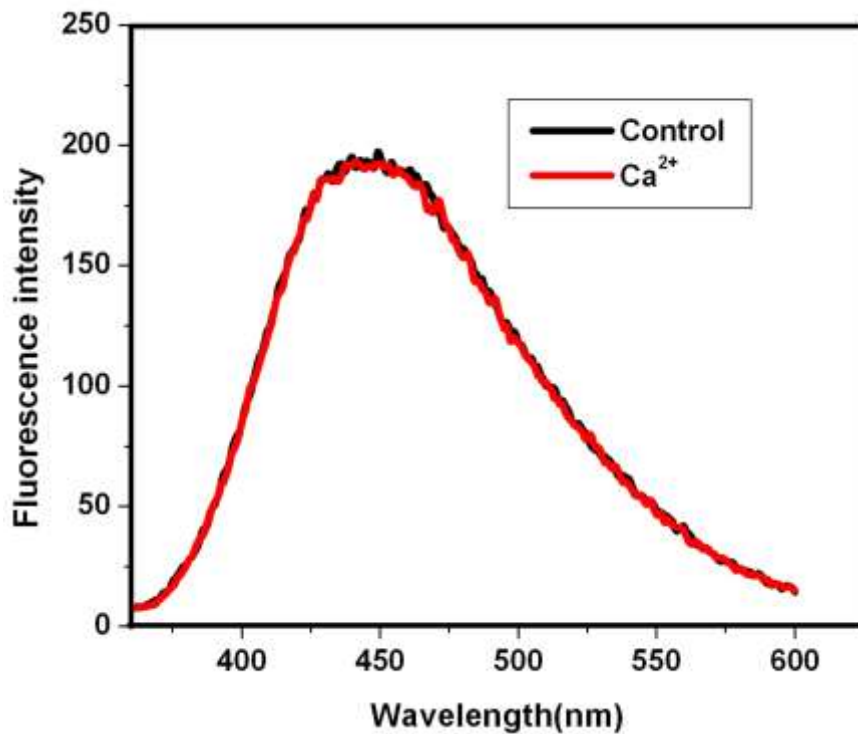

Fig S9. Fluorescence emission of HAGACD in presence of Ca

**Table S1 Zeta Potential by Dynamic Light Scattering**

| <b>Sample code</b> | <b>Zeta Potential<br/>(mV)</b> |
|--------------------|--------------------------------|
| CD                 | -20.9                          |
| HAGACD             | -0.579                         |
